# Supplementary material
Source: PubMed Central journal article supplement (PMC6440713)
Supplement: jamaoncol-e183486-s002.pdf [file jamaoncol-e183486-s002.pdf]

## Supplementary Online Content

Gridelli C, de Castro Carpeno J, Dingemans A-MC, et al. Bevacizumab plus standard-of-care treatment beyond disease progression in patients with advanced non–small cell lung cancer: the AvaALL randomized clinical trial. *JAMA Oncol*. Published online August 30, 2018. doi:10.1001/jamaoncol.2018.3486

**eTable 1.** Baseline Characteristics and Disease History of the ITT Population

**eTable 2.** Patients Exposed to Bevacizumab in Both Treatment Arms (Safety Population)

**eTable 3.** Grade 3 or 4 Adverse Events (Preferred Term Occurring in  $\geq 10\%$  of Patients with Grade 1 or 2 Events in Any Treatment Arm; Safety Population)

**eTable 4.** Treatment-Emergent Grade 5 Adverse Events by Body System and Preferred Term (Safety Population)

**eTable 5.** Cause of Death

**eFigure 1.** Timeline of Progressive Disease and Study Endpoints

**eFigure 2.** Forest Plot of OS by Subgroups

**eFigure 3.** PFS: (A) Kaplan-Meier Plot of PFS2 in the ITT Population; (B) Forest Plot of PFS2 by Subgroups

**eFigure 4.** PFS3 in the ITT Population

**eFigure 5.** TTP2 in the ITT Population

**eFigure 6.** TTP3 in the ITT Population

This supplementary material has been provided by the authors to give readers additional information about their work.

**eTable 1.** Baseline Characteristics and Disease History of the ITT Population

|                                                | Bevacizumab Plus SOC<br>(n = 245) | SOC Alone<br>(n = 240) |
|------------------------------------------------|-----------------------------------|------------------------|
| Median age, years (range)                      | 63.0 (26–84)                      | 63.0 (35–82)           |
| Gender, no. (%)                                |                                   |                        |
| Male                                           | 155 (63.3)                        | 138 (57.5)             |
| Female                                         | 90 (36.7)                         | 102 (42.5)             |
| Ethnicity, no. (%)                             |                                   |                        |
| Asian                                          | 29 (11.8)                         | 25 (10.4)              |
| Non-Asian                                      | 216 (88.2)                        | 215 (89.6)             |
| Smoking status, no. (%)                        |                                   |                        |
| Current                                        | 89 (36.3)                         | 88 (36.7)              |
| Former                                         | 120 (49.0)                        | 117 (48.8)             |
| Never                                          | 36 (14.7)                         | 35 (14.6)              |
| ECOG PS at baseline, no. (%)                   |                                   |                        |
| 0                                              | 87 (35.5)                         | 94 (39.2)              |
| 1                                              | 142 (58.0)                        | 138 (57.5)             |
| 2                                              | 11 (4.5)                          | 3 (1.3)                |
| Missing                                        | 5 (2.0)                           | 5 (2.1)                |
| Disease stage at initial diagnosis, no.<br>(%) |                                   |                        |
| 1                                              | 4 (1.6)                           | 5 (2.1)                |
| 2                                              | 7 (2.9)                           | 9 (3.8)                |
| 3A                                             | 16 (6.5)                          | 14 (5.8)               |
| 3B                                             | 14 (5.7)                          | 7 (2.9)                |

|                                                                 |             |             |
|-----------------------------------------------------------------|-------------|-------------|
| 4                                                               | 204 (83.3)  | 205 (85.4)  |
| Median time since initial diagnosis, months (range)             | 10.5 (3–88) | 10.3 (3–78) |
| Disease stage at start of first-line therapy, no. (%)           |             |             |
| 3A                                                              | 8 (3.3)     | 4 (1.7)     |
| 3B                                                              | 12 (4.9)    | 7 (2.9)     |
| 4                                                               | 225 (91.8)  | 229 (95.4)  |
| Median time from start of first-line therapy, months (range)    | 8.6 (1–28)  | 8.1 (3–44)  |
| Current stage of disease, no. (%)                               |             |             |
| 3A                                                              | 3 (1.2)     | 0           |
| 3B                                                              | 14 (5.7)    | 5 (2.1)     |
| 4                                                               | 228 (93.1)  | 235 (97.9)  |
| Histology, no. (%)                                              |             |             |
| Adenocarcinoma                                                  | 227 (92.7)  | 226 (94.2)  |
| Large cell carcinoma                                            | 6 (2.4)     | 6 (2.5)     |
| Bronchioloalveolar carcinoma/<br>adenocarcinoma in situ         | 3 (1.2)     | 2 (0.8)     |
| Other                                                           | 9 (3.7)     | 6 (2.5)     |
| Centrally located tumor at start of first-line therapy, no. (%) |             |             |
| Yes                                                             | 77 (31.4)   | 90 (37.5)   |
| No                                                              | 168 (68.6)  | 150 (62.5)  |

|                                                         |            |            |
|---------------------------------------------------------|------------|------------|
| Cavitated tumor at start of first-line therapy, no. (%) |            |            |
| Yes                                                     | 19 (7.8)   | 12 (5.0)   |
| No                                                      | 225 (91.8) | 228 (95.0) |
| Not done                                                | 1 (0.4)    | 0          |
| <i>EGFR</i> status assessment, no. (%)                  |            |            |
| Yes                                                     | 165 (67.3) | 168 (70.0) |
| Positive ( <i>EGFR</i> activating mutation)             | 1 (0.4)    | 1 (0.4)    |
| Negative ( <i>EGFR</i> wild type)                       | 160 (65.3) | 161 (67.1) |
| Not evaluable                                           | 4 (1.6)    | 6 (2.5)    |
| No                                                      | 80 (32.7)  | 72 (30.0)  |

Abbreviations: ECOG PS, Eastern Cooperative Oncology Group performance status; *EGFR*, epidermal growth factor receptor; ITT, intent to treat; SD, standard deviation; SOC, standard of care.

**eTable 2.** Patients Exposed to Bevacizumab in Both Treatment Arms

(Safety Population)

|                                                                           | Bevacizumab Plus<br>SOC<br>(n = 240) | SOC Alone<br>(n = 235) |
|---------------------------------------------------------------------------|--------------------------------------|------------------------|
| Mean number of cycles of bevacizumab,<br>no. (SD)                         | 11.9 (9.8)                           | 1.0 (0)                |
| Median treatment duration with<br>bevacizumab, months (range)             | 6.4 (0.03–40.0)                      | 0.03 (0.03–0.03)       |
| Starting daily dose of bevacizumab, no. (%)                               |                                      |                        |
| 7.5 mg/kg                                                                 | 116 (48.3)                           | 0                      |
| 15 mg/kg                                                                  | 124 (51.7)                           | 0                      |
| Mean cumulative dose of bevacizumab,<br>mg (SD)                           | 8,826.2 (7,899.2)                    | 455.3 (395.6)          |
| Patients with at least one bevacizumab<br>treatment interruption, no. (%) | 17 (7.1)                             | 0                      |

Abbreviations: SD, standard deviation; SOC, standard of care.

**eTable 3.** Grade 3 or 4 Adverse Events (Preferred Term Occurring in ≥10% of Patients With Grade 1 or 2 Events in Any Treatment Arm; Safety Population)

| System Organ Class and Preferred Term, no. (%)       | Bevacizumab Plus SOC (n = 243) | SOC Alone (n = 232) |
|------------------------------------------------------|--------------------------------|---------------------|
| Any AE                                               | 186 (76.5)                     | 140 (60.3)          |
| General disorders and administrative site conditions | 47 (19.3)                      | 32 (13.8)           |
| Fatigue                                              | 12 (4.9)                       | 14 (6.0)            |
| Asthenia                                             | 16 (6.6)                       | 12 (5.2)            |
| Gastrointestinal disorders                           | 33 (13.6)                      | 20 (8.6)            |
| Diarrhea                                             | 11 (4.5)                       | 6 (2.6)             |
| Nausea                                               | 6 (2.5)                        | 4 (1.7)             |
| Constipation                                         | 0                              | 1 (0.4)             |
| Vomiting                                             | 5 (2.1)                        | 3 (1.3)             |
| Respiratory, thoracic, and mediastinal disorders     | 36 (14.8)                      | 33 (14.2)           |
| Dyspnea                                              | 10 (4.1)                       | 13 (5.6)            |
| Epistaxis                                            | 0                              | 1 (0.4)             |
| Blood and lymphatic system disorders                 | 74 (30.5)                      | 50 (21.6)           |
| Anemia                                               | 18 (7.4)                       | 20 (8.6)            |
| Skin and subcutaneous tissue disorders               | 17 (7.0)                       | 6 (2.6)             |
| Alopecia                                             | 0                              | 0                   |
| Metabolism and nutritional disorders                 | 28 (11.5)                      | 14 (6.0)            |
| Decreased appetite                                   | 12 (4.9)                       | 3 (1.3)             |

|                             |         |         |
|-----------------------------|---------|---------|
| Renal and urinary disorders | 7 (2.9) | 2 (0.9) |
| Proteinuria                 | 3 (1.2) | 1 (0.4) |

Abbreviations: AE, adverse event; SOC, standard of care.

**eTable 4.** Treatment-Emergent Grade 5 Adverse Events by Body System and Preferred Term (Safety Population)

| System Organ Class and Preferred Term                   | Bevacizumab Plus<br>SOC (n = 243) | SOC Alone<br>(n = 232) |
|---------------------------------------------------------|-----------------------------------|------------------------|
| Any treatment-emergent grade 5 AE,<br>no. (%)           | 16 (6.6)                          | 12 (5.2)               |
| General disorders and administrative site<br>conditions | 4 (1.6)                           | 2 (0.9)                |
| Fatigue                                                 | 1 (0.4)                           | 0                      |
| Death                                                   | 1 (0.4)                           | 2 (0.9)                |
| Decreased PS                                            | 1 (0.4)                           | 0                      |
| Sudden death                                            | 1 (0.4)                           | 0                      |
| Gastrointestinal disorders                              | 2 (0.8)                           | 0                      |
| Large intestine perforation                             | 1 (0.4)                           | 0                      |
| Intestinal perforation                                  | 1 (0.4)                           | 0                      |
| Respiratory, thoracic, and mediastinal<br>disorders     | 2 (0.8)                           | 1 (0.4)                |
| Respiratory failure                                     | 1 (0.4)                           | 0                      |
| Aspiration                                              | 1 (0.4)                           | 0                      |
| Pulmonary embolism                                      | 0                                 | 1 (0.4)                |
| Infections and infestations                             | 5 (2.1)                           | 9 (3.9)                |
| Pneumonia                                               | 2 (0.8)                           | 8 (3.4)                |
| Lung infection                                          | 1 (0.4)                           | 1 (0.4)                |
| Respiratory tract infection                             | 1 (0.4)                           | 0                      |
| Bronchopulmonary aspergillosis                          | 1 (0.4)                           | 0                      |



|                             |         |   |
|-----------------------------|---------|---|
| Nervous system disorders    | 1 (0.4) | 0 |
| Cerebral infarction         | 1 (0.4) | 0 |
| Renal and urinary disorders | 1 (0.4) | 0 |
| Nephrotic syndrome          | 1 (0.4) | 0 |
| Cardiac disorders           | 1 (0.4) | 0 |
| Myocardial ischemia         | 1 (0.4) | 0 |

Abbreviations: AE, adverse event; PS, performance status; SOC, standard of care.

**eTable 5.** Cause of Death

|                                   | Bevacizumab<br>Plus SOC<br>(n = 245) | SOC Alone<br>(n = 240) |
|-----------------------------------|--------------------------------------|------------------------|
| Patients who died, no. (%)        | 194 (79.2)                           | 193 (80.4)             |
| Primary reason for death, no. (%) |                                      |                        |
| Disease progression               | 173 (70.6)                           | 172 (71.7)             |
| AE                                | 16 (6.5)                             | 10 (4.2)               |
| Other                             | 5 (2.0)                              | 11 (4.6)               |

Abbreviations: AE, adverse event; SOC, standard of care.

**eFigure 1.** Timeline of Progressive Disease and Study Endpoints

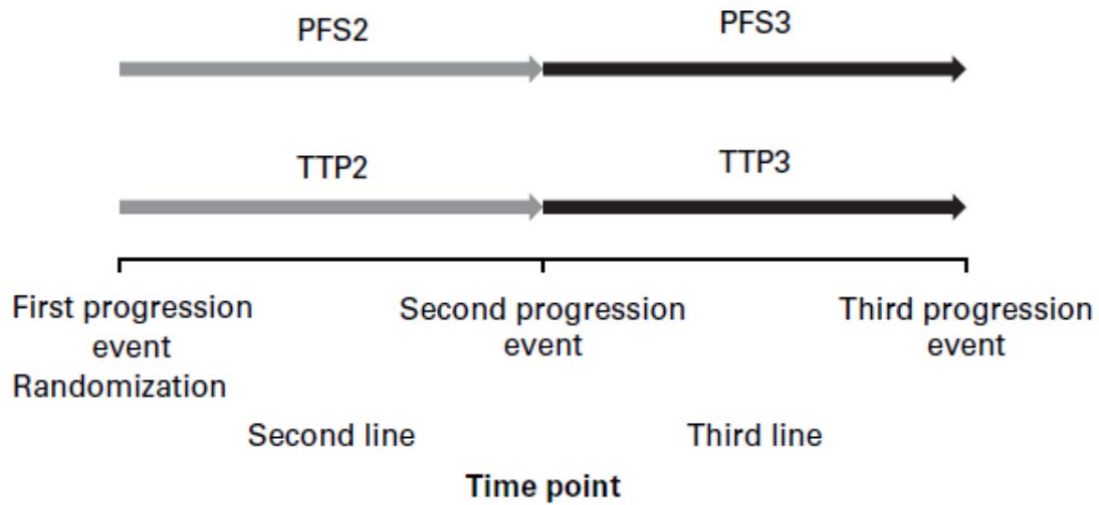

PFS was defined as time from randomization until progression or death; TTP was defined as time from randomization until objective tumor progression.

Abbreviations: PFS, progression-free survival; PFS2, time from randomization at first to second progression; PFS3, time from second to third progression; TTP, time to progression; TTP2, TTP from randomization at first to second progression; TTP3, TTP from second to third progression.

**eFigure 2.** Forest Plot of OS by Subgroups (Hazard Ratio Not Stratified)

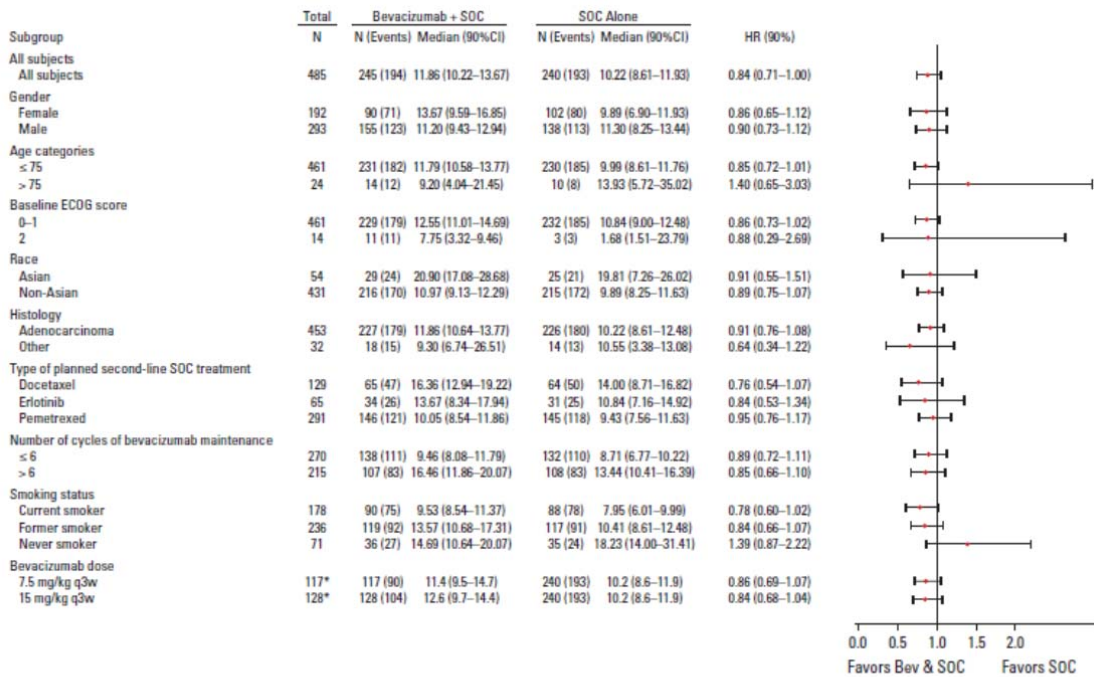

\*Includes patients randomized to bevacizumab, therefore not summing up to the Total N.

Abbreviations: CI, confidence interval; ECOG, Eastern Cooperative Oncology Group; HR, hazard ratio; q3w, every 3 weeks; SOC, standard of care.

**eFigure 3. PFS: (A) Kaplan-Meier Plot of PFS2 in the ITT Population; (B) Forest Plot of PFS2 by Subgroups**

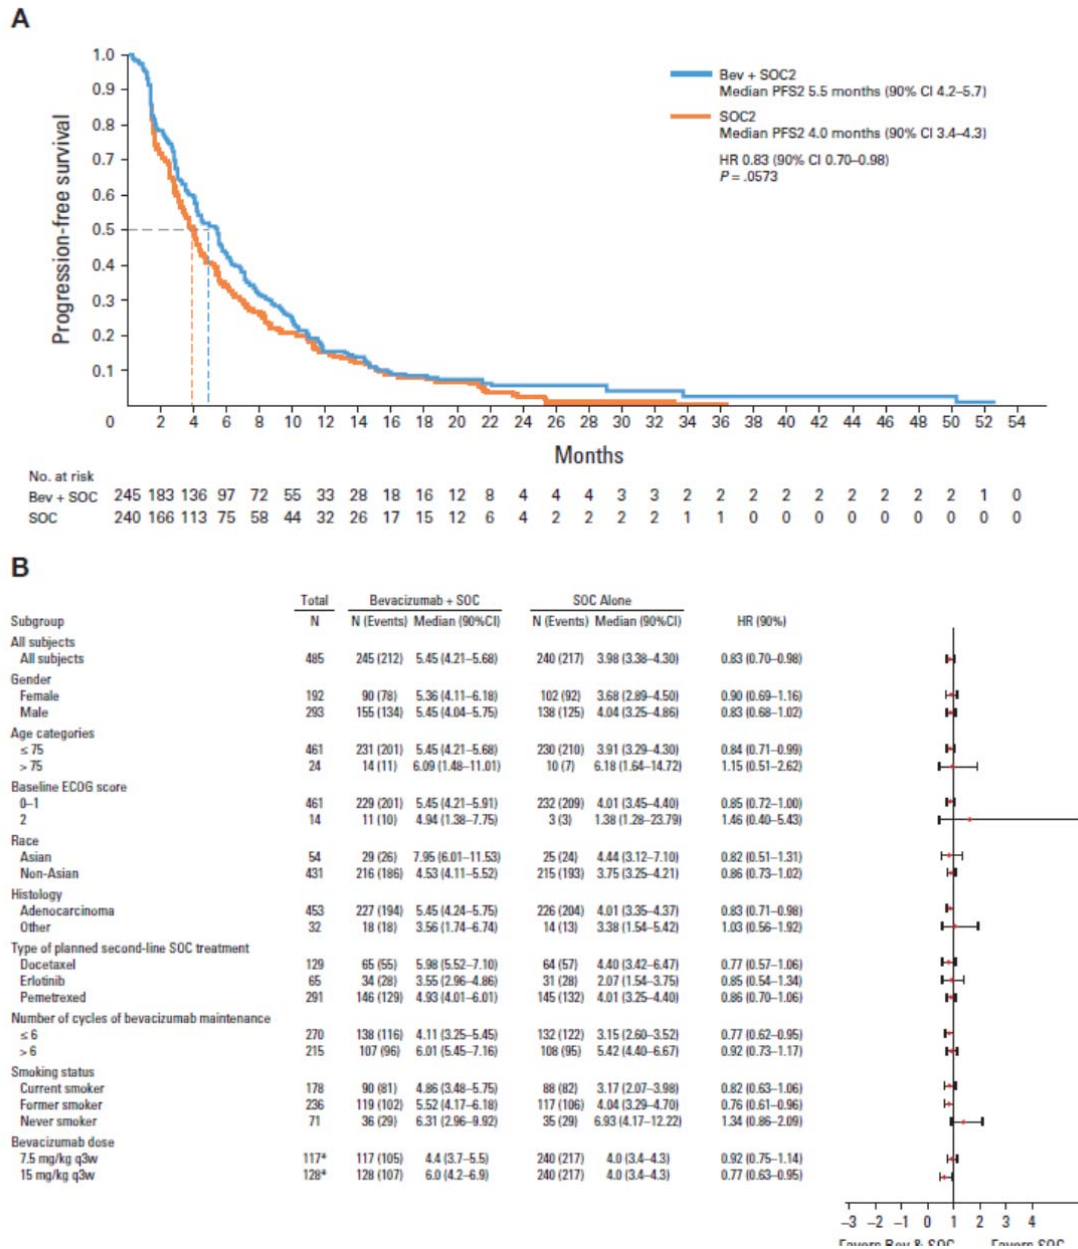

\*Includes patients randomized to bevacizumab, therefore not summing up to the Total N.

Abbreviations: Bev, bevacizumab; CI, confidence interval; ECOG, Eastern Cooperative Oncology Group; HR, hazard ratio; ITT, intent to treat; PFS2,

progression-free survival from first to second progression; q3w, every 3 weeks; SOC, standard of care.

HR for the ITT population is stratified; HR for the subgroups is not stratified.

**eFigure 4. PFS3 in the ITT Population**

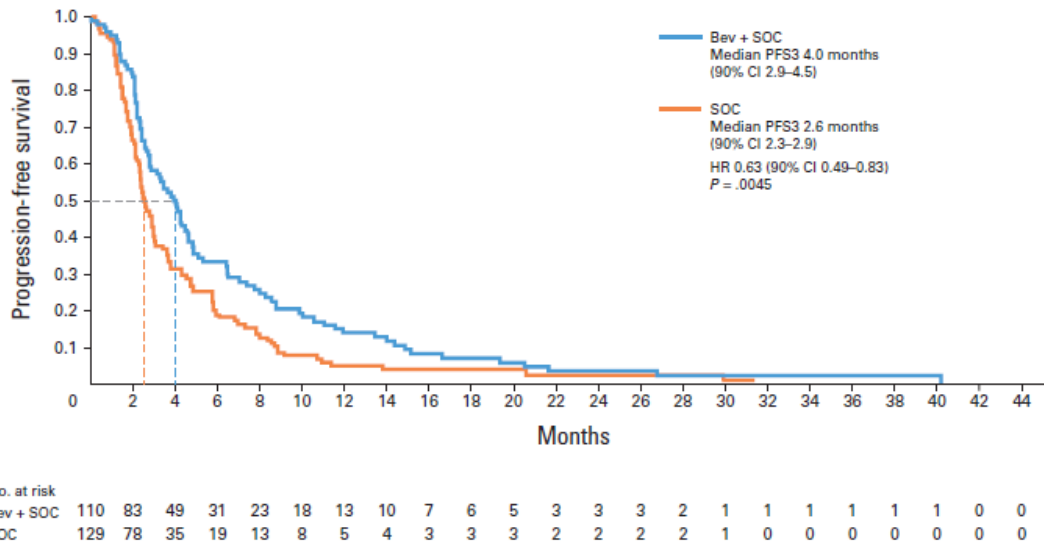

Abbreviations: Bev, bevacizumab; CI, confidence interval; HR, hazard ratio; ITT, intent to treat; PFS3, progression-free survival from second to third progression; SOC, standard of care.

**eFigure 5. TTP2 in the ITT Population**

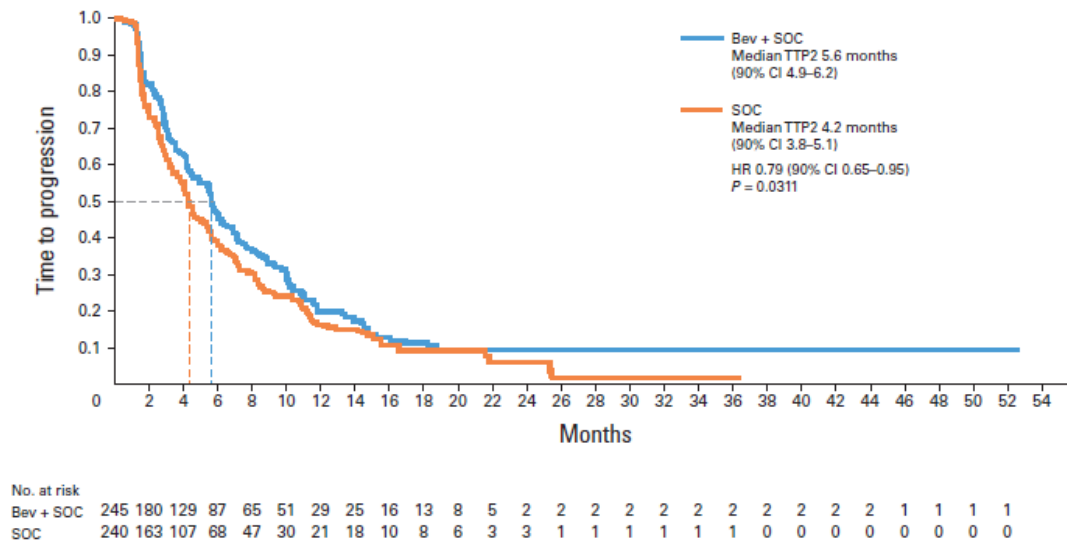

Abbreviations: Bev, bevacizumab; CI, confidence interval; HR, hazard ratio; ITT, intent to treat; SOC, standard of care; TTP2, time to progression from randomization at first to second progression.



**eFigure 6. TTP3 in the ITT Population**

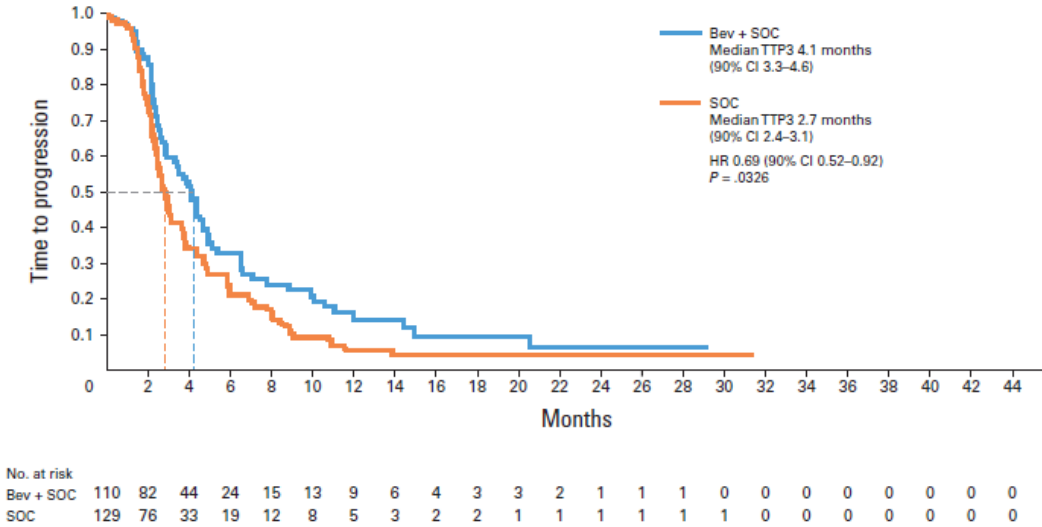

Abbreviations: Bev, bevacizumab; CI, confidence interval; HR, hazard ratio; ITT, intent to treat; SOC, standard of care; TTP3, time to progression from second to third progression.
